# Supplementary material
Source: HighWire-hosted journal article supplement (https://openheart.bmj.com/content/3/1/e000415)

**Supplementary Figure 1.** Yearly trends in the lesion wise MRRUF in the billed charges domain.

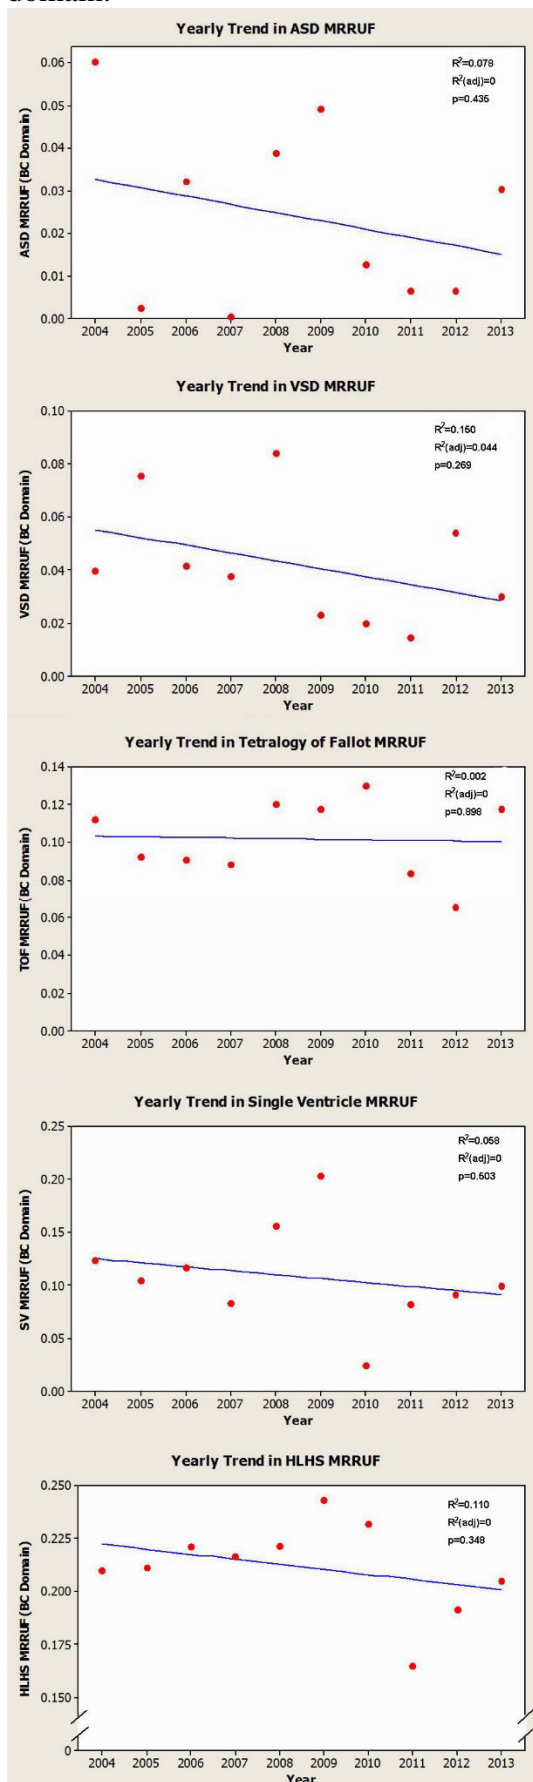

**Supplementary Figure 2.** Trends in MRRUF for each lesion by institutional volume.

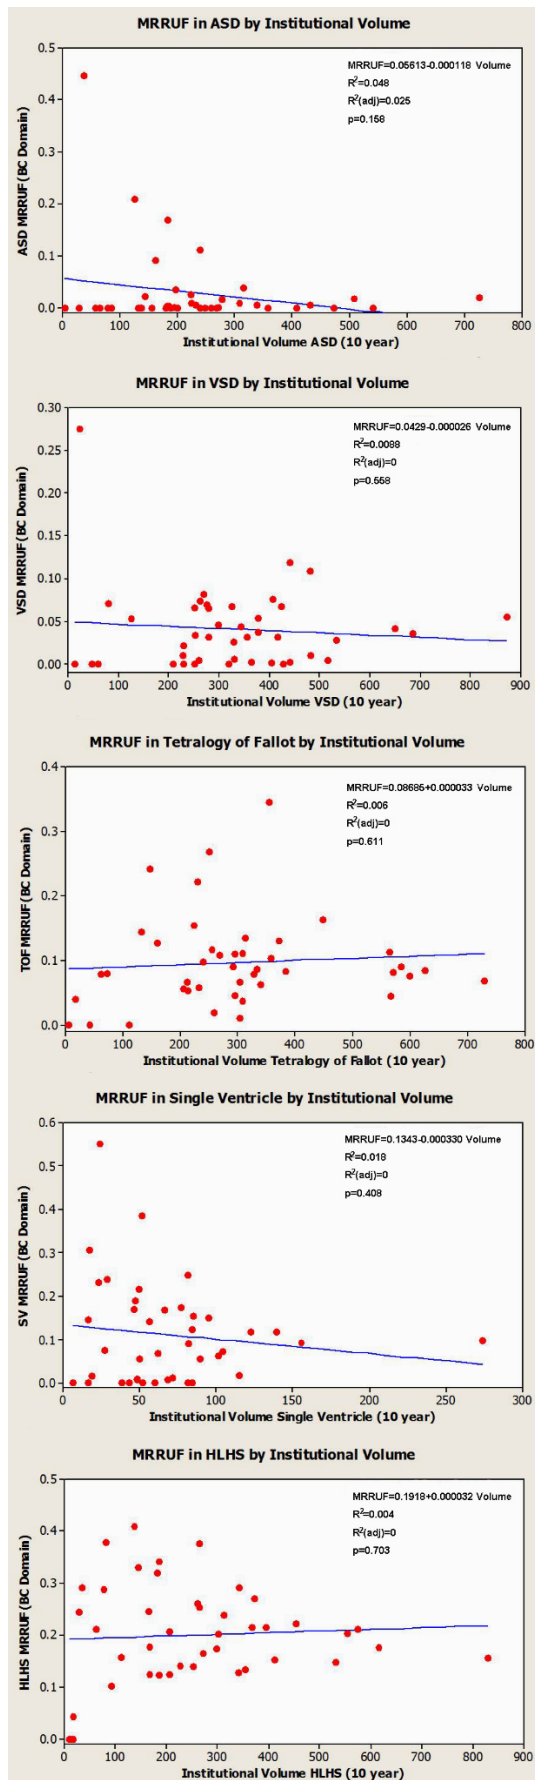

Supplement: inline-supplementary-material-1 [file inline-supplementary-material-1.pdf]
